# Supplementary material for: Mps1 phosphorylation of condensin II controls chromosome condensation at the onset of mitosis
Source: PubMed Central journal article supplement — J Cell Biol. 2014 Jun 23;205(6):781–90. doi: 10.1083/jcb.201308172 (PMC4068140; doi:10.1083/jcb.201308172), 2014-06-23
Supplement: supp_jcb.201308172_JCB_201308172_sm.pdf [file supp_jcb.201308172_JCB_201308172_sm.pdf]

Kagami et al., <http://www.jcb.org/cgi/content/full/jcb.201308172/DC1>

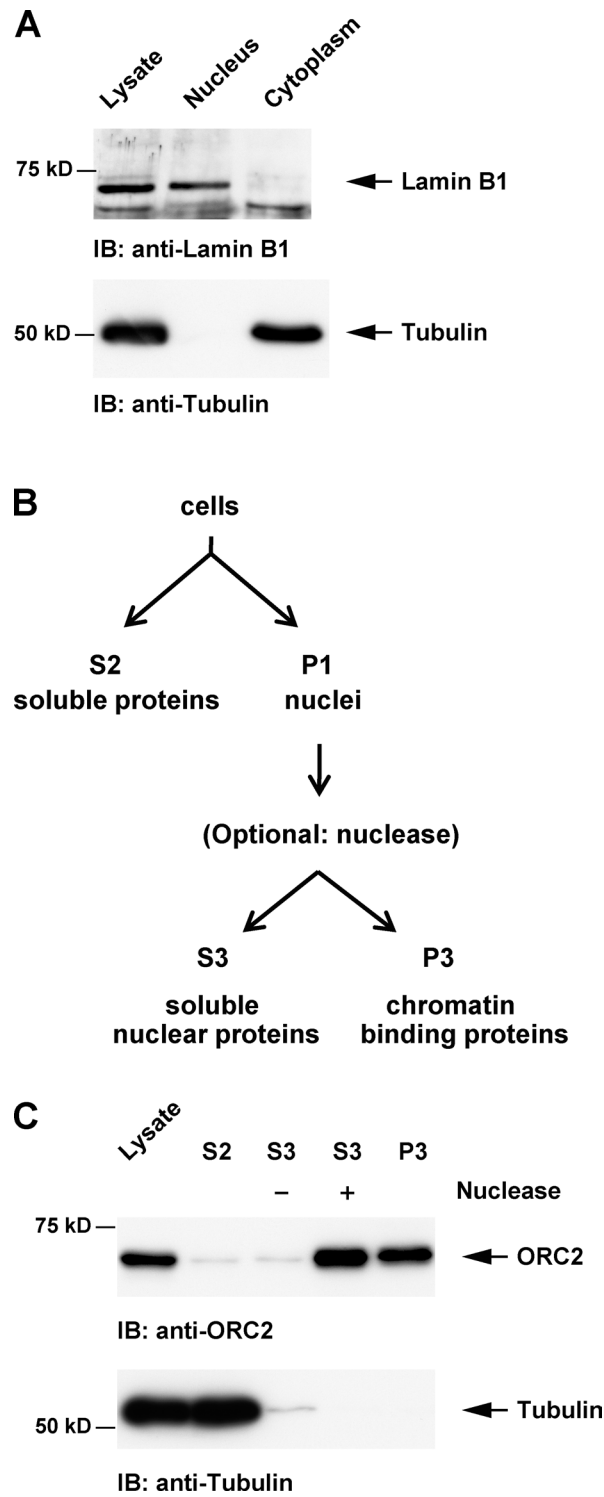

Figure S1. **Purity of subcellular fractionations.** (A) Nuclear or cytoplasmic lysates from HeLa cells were subjected to immunoblotting with anti-lamin B1 or anti-tubulin. (B) Scheme of the chromosome fractionation described in the Materials and methods. (C) HeLa cells were subjected to the chromosome fractionation. These fractions were subjected to immunoblot analysis with anti-ORC2 or anti-tubulin.

# A

## Peptide View

MS/MS Fragmentation of **FVQETELSQR**  
 Found in **CNDH2\_HUMAN**, Condensin-2 complex subunit H2 OS=Homo sapiens GN=NCAHP2 PE=1 SV=1

Match to Query 5126: 1315.571996 from(658.793274,2+)  
 Title: 7945  
 Data file: 121004-Kagami-Flag-CAPH2-GFP-Mps1-WT.txt

Click mouse within plot area to zoom in by factor of two about that point  
 Or,   to  Da   
 Label all possible matches  Label matches used for scoring

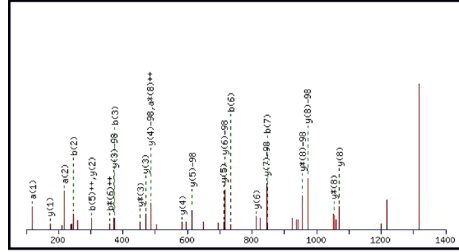

Monoisotopic mass of neutral peptide Mr (calc): 1315.5809  
 Variable modifications:  
 S8 : Phospho (ST) with neutral losses 97.9769 (shown in table), 0.0000  
 Ions Score: 65 Expect: 7.5e-005  
 Matches: 25/144 fragment ions using 31 most intense peaks (help)

| #  | a         | a <sup>++</sup> | a <sup>+</sup> | a <sup>++</sup> | b         | b <sup>++</sup> | b <sup>+</sup> | b <sup>++</sup> | Seq. | y         | y <sup>++</sup> | y <sup>+</sup> | y <sup>++</sup> | #  |
|----|-----------|-----------------|----------------|-----------------|-----------|-----------------|----------------|-----------------|------|-----------|-----------------|----------------|-----------------|----|
| 1  | 120.0808  | 60.5440         |                |                 | 148.0757  | 74.5415         |                |                 | F    | 1071.5429 | 536.2751        | 1064.5164      | 527.7618        | 10 |
| 2  | 219.1482  | 110.0782        |                |                 | 247.1441  | 124.0757        |                |                 | V    | 1071.5429 | 536.2751        | 1064.5164      | 527.7618        | 9  |
| 3  | 347.2078  | 174.1075        | 330.1812       | 165.5942        | 375.2027  | 188.1050        | 358.1761       | 179.5817        | Q    | 972.4745  | 486.7409        | 955.4480       | 478.2276        | 8  |
| 4  | 476.2504  | 238.6288        | 459.2238       | 230.1155        | 504.2453  | 252.6263        | 487.2187       | 244.1130        | E    | 844.4159  | 422.7116        | 827.3894       | 414.1983        | 7  |
| 5  | 577.2980  | 289.1527        | 560.2715       | 280.6394        | 605.2930  | 303.1501        | 588.2664       | 294.6368        | T    | 715.3733  | 358.1903        | 698.3468       | 349.6770        | 6  |
| 6  | 706.3406  | 353.6740        | 689.3141       | 345.1607        | 734.3355  | 367.6714        | 717.3090       | 359.1581        | E    | 614.3256  | 307.6685        | 597.2991       | 299.1532        | 5  |
| 7  | 819.4247  | 410.2180        | 802.3931       | 401.7027        | 847.4196  | 424.2134        | 830.3931       | 415.7002        | L    | 485.2831  | 243.1452        | 468.2565       | 234.6319        | 4  |
| 8  | 888.4462  | 444.7267        | 871.4196       | 436.2134        | 916.4411  | 458.7242        | 899.4145       | 450.2109        | S    | 372.1990  | 186.6031        | 355.1724       | 178.0899        | 3  |
| 9  | 1016.5047 | 508.7560        | 999.4782       | 500.2427        | 1044.4997 | 522.7535        | 1027.4731      | 514.2402        | Q    | 303.1775  | 152.0924        | 288.1510       | 143.5791        | 2  |
| 10 |           |                 |                |                 |           |                 |                |                 | R    | 175.1190  | 88.0631         | 158.0824       | 79.5498         | 1  |

# B

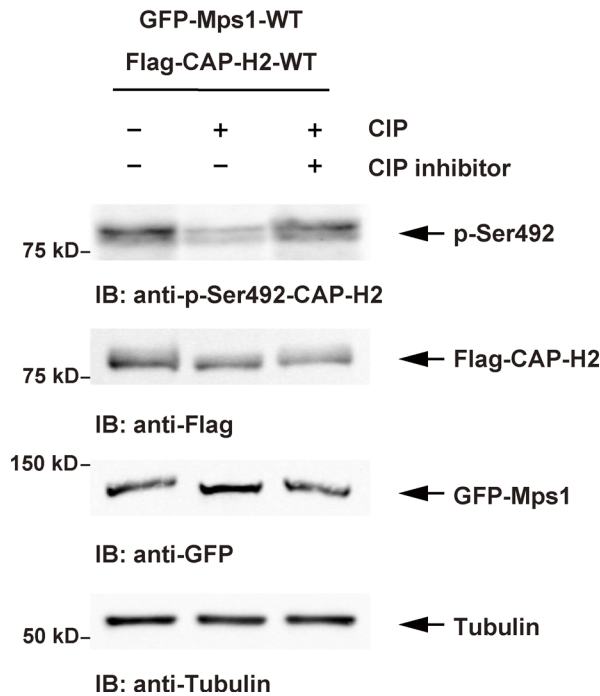

Figure S2. **Mps1 phosphorylates Ser492 of CAP-H2.** (A) The tandem mass spectrometry spectra (top) and peptide fragmentation table (bottom) of the 658.79 m/z (45.59 min) peak are shown. (B) 293 cells were cotransfected with GFP-Mps1-WT and Flag-CAP-H2-WT. Cell lysates were incubated with calf intestinal alkaline phosphatase (CIP) and/or CIP inhibitors and subjected to immunoblot analysis.

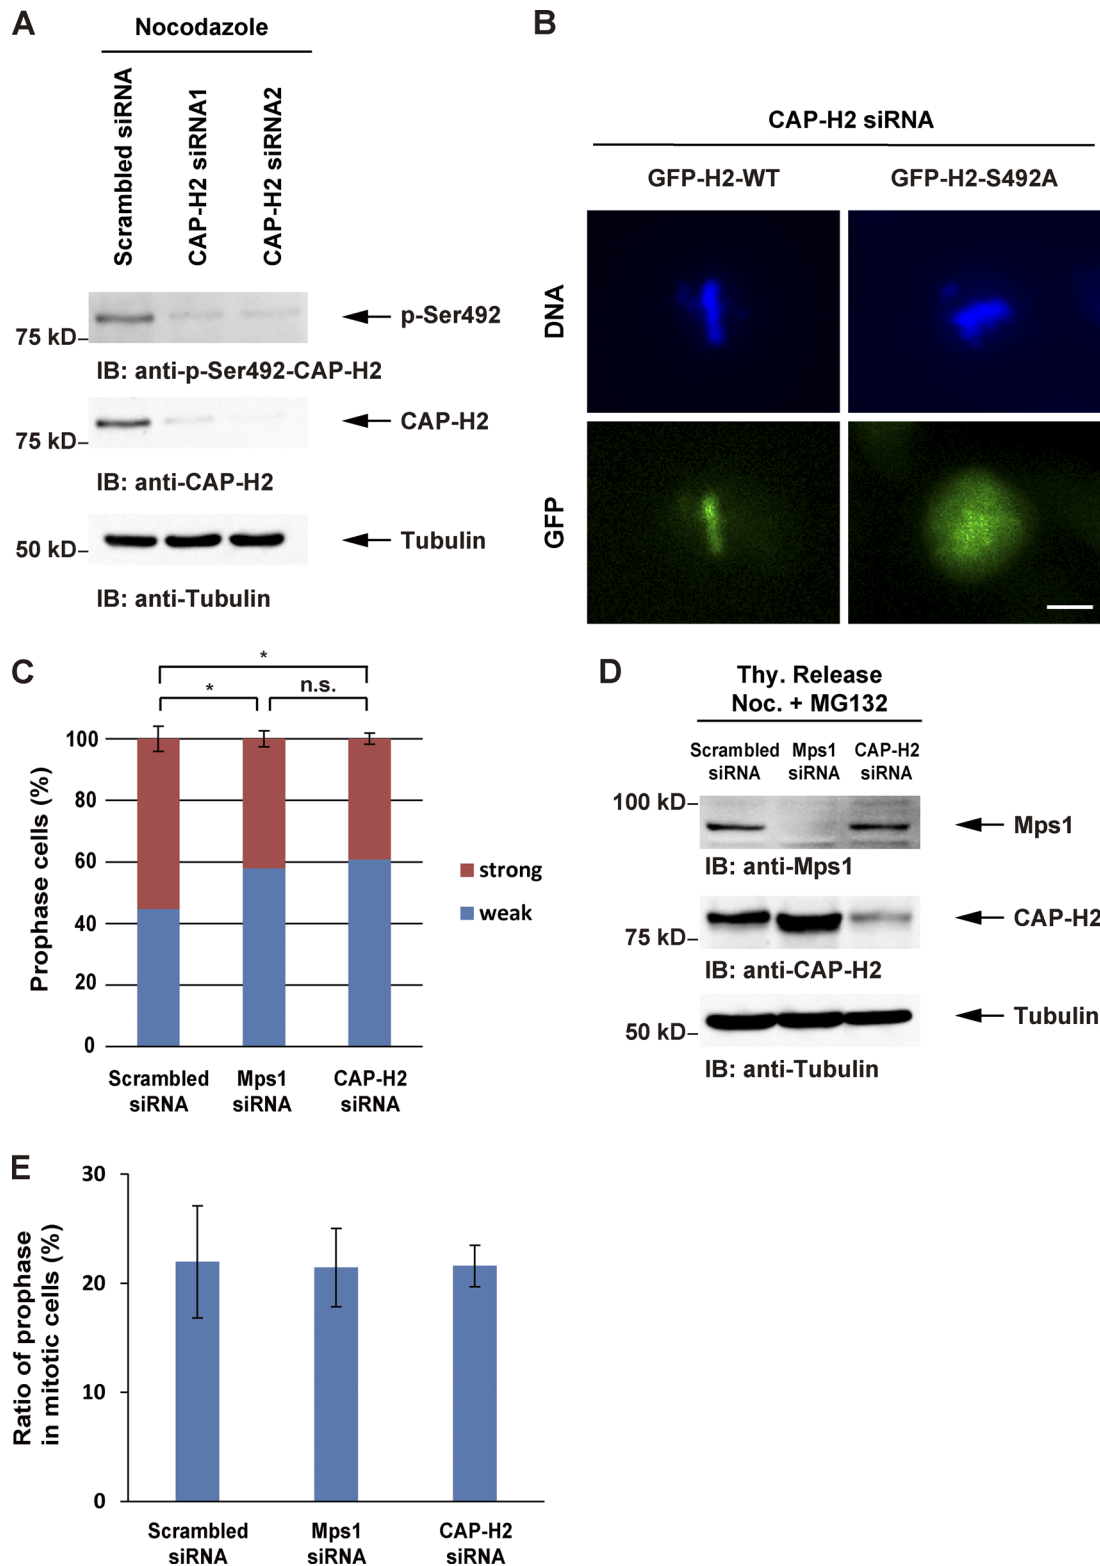

Figure S3. **Ser492 phosphorylation during mitosis.** (A) HeLa cells were transfected with the indicated siRNAs followed by nocodazole treatment. Whole-cell lysates were analyzed by immunoblotting. (B) WT or S492A cell lines were transfected with CAP-H2 siRNA. DNA was stained by Hoechst 33342. The images of living cells were shown. Bar, 10  $\mu$ m. (C) HeLa cells were synchronized by double thymidine block and transfected with indicated siRNAs. Cells were then released into the medium containing nocodazole. At 9 h after release, cells were treated with MG132 for 30 min and fixed. The percentage of each category, as defined in Fig. 5 A, was calculated. Data represent the mean  $\pm$  SD from three independent experiments (\*,  $P < 0.05$ ; n.s., not significant). (D) The efficiency of protein depletion by siRNAs in C was analyzed by immunoblotting with the indicated antibodies. (E) Ratio of prophase in mitotic cells in C was calculated. Data represent the mean  $\pm$  SD from three independent experiments.
